# Supplementary material for: Benefits of Exome Sequencing in Children with Suspected Isolated Hearing Loss
Source: MDPI journal article supplement (doi:10.3390/genes12081277), 2021-08-20
Supplement: s1 [file s1]

**Table S3. Phenotypes in adults:** brief description of auditory and associated phenotypes in our adult cohort.

AMD= age-related macular degeneration, CT=computed tomography, F= female, HL=hearing loss, M=male, MRI=magnetic resonance imaging, SN= sensorineural.

| Patient | Sex | Age at diagnosis | Age and type of onset                                                                            | Type       | Laterality             | Severity | Progressive | Family history | Consanguinity | Malformations at the time of CT/MRI | Other                               |
|---------|-----|------------------|--------------------------------------------------------------------------------------------------|------------|------------------------|----------|-------------|----------------|---------------|-------------------------------------|-------------------------------------|
| 62      | M   | Postlingual      | 29 years - progressive and asymmetric                                                            | SN         | Bilateral (asymmetric) | Moderate | Yes         | Yes            | No            | Yes                                 | Multiple meningiomas                |
| 63      | F   | Postlingual      | 30 years - progressive                                                                           | SN         | Bilateral              | Severe   | Yes         | Yes            | No            | Yes                                 | Vertigo / vestibular areflexia      |
| 64      | F   | Postlingual      | 8 years – hearing aids at 18 years - progressive                                                 | SN         | Bilateral              | Moderate | Yes         | Yes            | Yes           | No                                  | No                                  |
| 65      | F   | Postlingual      | Started brutally at 52 years with vertigo - first profound right ear HL, followed by left ear HL | Perception | Bilateral (asymmetric) | Severe   | Yes         | No             | Yes           | Yes                                 | Vertigo /right vestibular areflexia |
| 66      | M   | Postlingual      | 65 years - progressive                                                                           | SN         | Bilateral (asymmetric) | Moderate | Yes         | No             | No            | Yes                                 | AMD                                 |
| 67      | M   | Postlingual      | Childhood - progressive                                                                          | SN         | Bilateral              | Severe   | Yes         | Yes            | No            | Not performed                       | No                                  |

|    |   |             |                                                                  |    |           |          |     |         |         |               |                               |
|----|---|-------------|------------------------------------------------------------------|----|-----------|----------|-----|---------|---------|---------------|-------------------------------|
| 68 | F | Postlingual | 45 years – sudden HL after upper airway infection - left > right | SN | Bilateral | Profound | Yes | No      | No      | No            | Tinnitus                      |
| 69 | F | Postlingual | 46 years - progressive first, then sudden worsening HL           | SN | Bilateral | Severe   | Yes | Unknown | Unknown | No            | Vertigo/ white matter anomaly |
| 70 | F | Postlingual | Childhood - progressive - 2006 marked inconvenience              | SN | Bilateral | Moderate | Yes | Yes     | No      | Not performed | No                            |
