# Supplementary material for: Benefits of Exome Sequencing in Children with Suspected Isolated Hearing Loss
Source: MDPI journal article supplement (doi:10.3390/genes12081277), 2021-08-20
Supplement: s1 [file s1]

**Table S6. GJB2 direct sequencing** – Brief description of patient's phenotype and variants in GJB2 detected by direct sequencing. All patients displayed congenital, SN, bilateral HL. None of them were born from a consanguinous union. F= female, M=male, NR= not reported, rs= Reference SNP.

| Patient | Sex | Severity | Family history | Malformations at the CT/IRM | Additional signs | Variant description                                                                                     | Rs number                    |
|---------|-----|----------|----------------|-----------------------------|------------------|---------------------------------------------------------------------------------------------------------|------------------------------|
| 71      | M   | Severe   | No             | Yes                         | NR               | homozygous c.35delG, p.(Gly12Valfs*2) in <i>GJB2</i>                                                    | rs80338939                   |
| 72      | M   | Severe   | No             | Not performed               | NR               | homozygous c.35delG, p.(Gly12Valfs*2) in <i>GJB2</i>                                                    | rs80338939                   |
| 73      | F   | Moderate | No             | Not performed               | NR               | compound heterozygous for c.59T>C, p.(Ile20Thr), heterozygous for c.109G>A, p.(Val37Ile) in <i>GJB2</i> | rs1057517519;<br>rs146378222 |
| 74      | M   | Severe   | No             | Yes                         | No               | homozygous c.269T>C, p.Leu90Pro in <i>GJB2</i>                                                          | rs80338945                   |
| 75      | F   | Profound | Yes            | Not performed               | No               | homozygous c.35delG, p.(Gly12Valfs*2) in <i>GJB2</i>                                                    | rs80338939                   |
