# Supplementary material for: Benefits of Exome Sequencing in Children with Suspected Isolated Hearing Loss
Source: MDPI journal article supplement (doi:10.3390/genes12081277), 2021-08-20
Supplement: s1 [file s1]

**Table S1.** In house hearing loss gene panel (189 genes). Genes are listed following their HUGO Gene Nomenclature Committee symbol.

|          |         |         |          |          |          |
|----------|---------|---------|----------|----------|----------|
| ABCC1    | COL11A1 | FRAS1   | MAN2B1   | PAX3     | SOX10    |
| ABHD12   | COL11A2 | FOXI1   | MANBA    | PCDH15   | SOX2     |
| ABHD5    | COL2A1  | FREM2   | MARVELD2 | PDZD7    | STRC     |
| ACTG1    | COL4A3  | FXN     | MASP1    | PEX1     | SYNE4    |
| ADCY1    | COL4A4  | GATA3   | MET      | PJVK     | TBC1D24  |
| ADGRV1   | COL4A5  | GIPC3   | MITF     | PLCB4    | TCOF1    |
| AIFM1    | COL4A6  | GJB2    | MSRB3    | PNPT1    | TECTA    |
| ALMS1    | COL9A1  | GJB3    | MT-RNR1  | POLR1A   | TFAP2A   |
| ANKH     | COL9A2  | GJB6    | MT-TE    | POLR1C   | TIMM8A   |
| ATP6V1B1 | COL9A3  | GNAI3   | MT-TK    | POLR1D   | TJP2     |
| BCS1L    | CRYM    | GPSM2   | MT-TL1   | POU3F4   | TMC1     |
| BDP1     | DCDC2   | GRHL2   | MT-TS1   | POU4F3   | TMEM132E |
| BSND     | DHODH   | GRIP1   | MYH14    | PRPS1    | TMIE     |
| BTD      | DIABLO  | GRXCR1  | MYH9     | PTPRQ    | TMPRSS3  |
| CABP2    | DIAPH1  | GSC     | MYO15A   | RDX      | TNC      |
| CACNA1D  | DIAPH3  | GRXCR2  | MYO1A    | RIPOR2   | TPRN     |
| CCDC50   | DNMT1   | GSDME   | MYO3A    | RPS6KA3  | TRIOBP   |
| CDC6     | DSPP    | HARS2   | MYO6     | SALL1    | TSPEAR   |
| CD151    | EDN3    | HGF     | MYO7A    | SALL4    | TYR      |
| CDH23    | EDNRA   | HMX1    | NARS2    | SEMA3E   | USH1C    |
| CDT1     | EDNRB   | HOMER2  | NDP      | SERAC1   | USH1G    |
| CEACAM16 | EFTUD2  | HOXA2   | NLRP12   | SERPINB6 | USH2A    |
| CEP78    | EIF4A3  | HSD17B4 | NLRP3    | SIX1     | WFS1     |
| CHD7     | ELMOD3  | ILDR1   | OPA1     | SIX5     | WHRN     |
| CHSY1    | EPS8    | KARS    | ORC1     | SLC17A8  |          |
| CIB2     | ESPN    | KCNE1   | ORC4     | SLC19A2  |          |
| CISD2    | ESRRB   | KCNJ10  | ORC6     | SLC26A4  |          |
| CLDN14   | EYA1    | KCNQ1   | OSBPL2   | SLC26A5  |          |
| CLIC5    | EYA4    | KCNQ4   | OTOA     | SLC29A3  |          |
| CLPP     | FGF10   | LARS2   | OTOF     | SLC4A11  |          |
| CLRN1    | FGF3    | LHFPL5  | OTOG     | SLITRK6  |          |
| ABCC1    | FGFR2   | LOXHD1  | OTOGL    | SMPX     |          |
| COCH     | FGFR3   | LRTOMT  | P2RX2    | SNAI2    |          |
