# Supplementary material for: Benefits of Exome Sequencing in Children with Suspected Isolated Hearing Loss
Source: MDPI journal article supplement (doi:10.3390/genes12081277), 2021-08-20
Supplement: s1 [file s1]

**Table S4.** Summary of positive molecular results (children and adults (patient 62 and 63)). AD = autosomal dominant, AR= autosomal recessive, HL= hearing loss, LDS= Loeys-Dietz Syndrome, L.P. = Likely Pathogenic, MIM= Mendelian Inheritance in Man, N.A.= not applicable, p= protein, P.=Pathogenic, Pt.=Patient, rs= Reference SNP, XL = X-linked.

| Gene ID | Molecular Results                                                                          | Rs Number               | ACMG classification       | Transmission type | Phenotype (Phenotype MIM number)                                                      | Syndromic       | Inheritance        | Pt. |
|---------|--------------------------------------------------------------------------------------------|-------------------------|---------------------------|-------------------|---------------------------------------------------------------------------------------|-----------------|--------------------|-----|
| COL4A5  | heterozygous c.1525G>C, p.(Gly509Arg)                                                      | N.A.                    | L.P. (class IV)           | XL                | Alport syndrome, 1 X-linked (MIM: 301050)                                             | Yes potentially | <i>De novo</i>     | 1   |
| USH1G   | homozygous c.1373A>T, p.(Asp458Val)                                                        | rs397517925             | L.P. (class IV)           | AR                | Usher syndrome, 1G (MIM: 606943)                                                      | Yes             | Inherited in trans | 2   |
| GJB2    | compound heterozygous for c.35delG, p.(Gly12Valfs*2) ; heterozygous c.101T>C, p.(Met34Thr) | rs80338939, rs35887622  | P. (class V)/P. (class V) | AR                | Deafness, autosomal recessive 1A (MIM: 220290)                                        | No              | Inherited in trans | 3   |
| GJB2    | compound heterozygous c.35del, p.(Gly12Valfs*2) ; c.139G>T, p.(Glu47*)                     | rs80338939, rs104894398 | P. (class V)/P. (class V) | AR                | Deafness, autosomal recessive 1A (MIM: 220290)                                        | No              | Inherited in trans | 8   |
| GJB2    | heterozygous c.223C>T, p.(Arg75Trp)                                                        | rs104894402             | P. (class V)              | AD                | Keratoderma, palmoplantar, with deafness (MIM: 148350)                                | Yes             | <i>De novo</i>     | 20  |
| SIX1    | heterozygous c.386A>C, p.(Tyr129Ser)                                                       | rs104894478             | P. (class V)              | AD                | Branchiootic syndrome, 3 (MIM: 608389) ; Deafness, autosomal dominant 23 (MIM:605192) | Yes             | <i>De novo</i>     | 4   |

|                |                                                                                     |                             |                                   |    |                                                                                                       |                                                         |                                                  |    |
|----------------|-------------------------------------------------------------------------------------|-----------------------------|-----------------------------------|----|-------------------------------------------------------------------------------------------------------|---------------------------------------------------------|--------------------------------------------------|----|
| <i>LARS2</i>   | compound heterozygous<br>c.457A>C,<br>p.(Asn153His);<br>c.1565C>A,<br>p.(Thr522Asn) | rs786205560,<br>rs199589947 | L.P. (class IV)<br>/ P. (class V) | AR | Perrault syndrome, 4 (MIM: 615300)                                                                    | Yes ovarian failure diagnosed after molecular diagnosis | Inherited in trans                               | 5  |
| <i>ILDR1</i>   | homozygous<br>c.942C>A,<br>p.(Cys314*)                                              | rs752714222                 | P. (class V)                      | AR | Deafness, autosomal recessive 42 (MIM: 609646)                                                        | No                                                      | Inherited in trans                               | 6  |
| <i>ACTG1</i>   | heterozygous<br>c.440G>A,<br>p.(Arg147His)                                          | N.A.                        | L.P. (class IV)                   | AD | Deafness, autosomal dominant 20/26 (MIM: 604717)                                                      | No                                                      | <i>De novo</i>                                   | 7  |
| <i>ACTG1</i>   | heterozygous<br>c.826G>A,<br>p.(Glu276Lys)                                          | N.A.                        | L.P. (class IV)                   | AD | Deafness, autosomal dominant 20/26 (MIM: 604717)                                                      | No                                                      | <i>De novo</i>                                   | 16 |
| <i>ACTG1</i>   | heterozygous<br>c.830C>T<br>p.(Thr277Ile)                                           | N.A.                        | P. (class V)                      | AD | Deafness, autosomal dominant progressive 20/26 (MIM: 604717), Baraitser-Winter syndrome (MIM: 614853) | Yes potentially                                         | <i>De novo</i>                                   | 30 |
| <i>GATA3</i>   | heterozygous<br>c.778+1G>A,<br>p.(?)                                                | N.A.                        | P. (class V)                      | AD | Hypoparathyroidism, sensorineural deafness, and renal dysplasia (MIM: 146255)                         | Yes                                                     | <i>De novo</i>                                   | 9  |
| <i>GATA3</i>   | heterozygous<br>c.431delG,<br>p.(Gly144Alafs*51)                                    | rs1588377948                | P. (class V)                      | AD | Hypoparathyroidism, sensorineural deafness, and renal dysplasia (MIM: 146255)                         | Yes                                                     | <i>De novo</i>                                   | 19 |
| <i>SLC17A8</i> | heterozygous<br>c.634C>A,<br>p.(Pro212Thr)                                          | N.A.                        | L.P. (class IV)                   | AD | Deafness, autosomal dominant 25 (MIM: 605583)                                                         | No                                                      | Inherited from mother without HL                 | 10 |
| <i>LOXHD1</i>  | homozygous<br>c.3061+1G>A,<br>p.(?)                                                 | rs537227442                 | P. (class V)                      | AR | Deafness, autosomal recessive 77 (MIM: 613079)                                                        | No                                                      | Inherited one variant from mother/father<br>N.A. | 11 |

|             |                                                                                                                                      |                   |                                |    |                                                         |                                                        |                    |    |
|-------------|--------------------------------------------------------------------------------------------------------------------------------------|-------------------|--------------------------------|----|---------------------------------------------------------|--------------------------------------------------------|--------------------|----|
| <i>OTOA</i> | Compound heterozygous for a gene conversion between <i>OTOA</i> gene and <i>OTOAP1</i> pseudogene; deletion of <i>OTOA</i>           | N.A.              | P. (class V)                   | AR | Deafness, autosomal recessive 22 (MIM: 607039)          | No                                                     | Inherited in trans | 17 |
| <i>WFS1</i> | heterozygous c.2051C>T, p.(Ala684Val)                                                                                                | rs387906930       | P. (class V)                   | AD | Wolfram-like syndrome, autosomal dominant (MIM: 614296) | Yes optic atrophy discovered after molecular diagnosis | <i>De novo</i>     | 18 |
| <i>STRC</i> | compound heterozygous <i>CKMT1B</i> , <i>STRC</i> , <i>CATSPER2</i> deletion ; c.4917_4918del ACinsCT, p.(Leu1640Phe) in <i>STRC</i> | N.A./ rs727503441 | P.(class V)/ V.U.S (class III) | AR | Deafness, autosomal recessive 16 (MIM: 603720)          | No                                                     | Inherited in trans | 12 |
| <i>STRC</i> | compound heterozygous <i>CKMT1B</i> , <i>STRC</i> deletion; <i>CKMT1B</i> , <i>STRC</i> , <i>CATSPER2</i> deletion                   | N.A.              | P. (class V)/P. (class V)      | AR | Deafness, autosomal recessive 16 (MIM: 603720)          | No                                                     | Inherited in trans | 13 |

|                                               |                                                                                                                                     |                   |                               |    |                                                                                                                   |                 |                                                                  |    |
|-----------------------------------------------|-------------------------------------------------------------------------------------------------------------------------------------|-------------------|-------------------------------|----|-------------------------------------------------------------------------------------------------------------------|-----------------|------------------------------------------------------------------|----|
| <i>STRC</i>                                   | compound heterozygous c.4425G>C, p.(Trp1475Cys) in <i>STRC</i> and <i>CKMT1B</i> , <i>STRC</i> , <i>CATSPER2</i> deletion           | rs727503443/ N.A. | L.P. (class IV)/ P. (class V) | AR | Deafness, autosomal recessive 16 (MIM: 603720)                                                                    | No              | Inherited in trans                                               | 14 |
| <i>STRC</i> ; <i>CKMT1B</i> ; <i>CATSPER2</i> | homozygous deletion of <i>CKMT1B</i> , <i>STRC</i> , <i>CATSPER2</i>                                                                | N.A.              | P. (class V)/P. (class V)     | AR | Deafness and male infertility (MIM: 611102)                                                                       | Yes potentially | Inherited in trans                                               | 15 |
| <i>STRC</i>                                   | compound heterozygous c.4837G>T, p.(Glu1613*)in <i>STRC</i> and <i>CKMT1B</i> , <i>STRC</i> , (and maybe <i>CATSPER2</i> ) deletion | rs769443188/ N.A. | P. (class V)/P. (class V)     | AR | Deafness, autosomal recessive 16 (MIM: 603720)                                                                    | No              | Inherited in trans                                               | 22 |
| <i>POU4F3</i> ; <i>OPA1</i>                   | heterozygous c.502del, p.(Ala168Profs* 36) in <i>POU4F3</i> ; heterozygous c.1118C>G, p.(Ser373Cys) in <i>OPA1</i>                  | rs766631025/ N.A. | P. (class V)/ L.P. (class IV) | AD | Deafness, autosomal dominant 15 (MIM: 602459); Optic atrophy plus syndrome (MIM: 125250).                         | Yes potentially | <i>POU4F3</i> Inherited from father with HL/ <i>OPA1 de novo</i> | 21 |
| <i>COL11A1</i>                                | heterozygous deletion                                                                                                               | N.A.              | P. (class V)                  | AD | Deafness, autosomal dominant 37 (MIM 618533) Stickler Syndrome II (MIM: 604841) / Marshall syndrome (MIM: 154780) | Yes potentially | Inherited from mother with HL                                    | 23 |

|                               |                                                                                                          |                    |                               |    |                                                                                                                                                      |                                                |                                                                            |    |
|-------------------------------|----------------------------------------------------------------------------------------------------------|--------------------|-------------------------------|----|------------------------------------------------------------------------------------------------------------------------------------------------------|------------------------------------------------|----------------------------------------------------------------------------|----|
| <i>COL11A1</i>                | heterozygous deletion splicing site <i>COL11A1</i> , (c.4519-2Adel,p.(?))                                | N.A.               | L.P. (class IV)               | AD | Deafness, autosomal dominant 37 (MIM 618533) Stickler Syndrome II (MIM: 604841) / Marshall syndrome (MIM: 154780)                                    | Yes potentially                                | Inherited from mother without HL                                           | 26 |
| <i>COL11A1</i> ; <i>SMAD3</i> | heterozygous c.4547G>T, p.(Gly1516Val) in <i>COL11A1</i> ; heterozygous c.3G>A (p.Met1?) in <i>SMAD3</i> | rs1553193910 /N.A. | P. (class V)/ L.P. (class IV) | AD | Deafness, autosomal dominant 37 (MIM 618533) Stickler Syndrome II (MIM: 604841) / Marshall syndrome (MIM: 154780); Loeys-Dietz syndrome (MIM:613795) | Yes for Stickler syndrome/ potentially for LDS | <i>SMAD3</i> inherited from affected mother/ <i>COL11A1</i> <i>de novo</i> | 24 |
| <i>TRIOBP</i>                 | homozygous c.3214dup, p.(Arg1072Profs*12)                                                                | N.A.               | P. (class V)                  | AR | Deafness, autosomal recessive 28 (MIM: 609823)                                                                                                       | No                                             | N.A.                                                                       | 25 |
| <i>TMPRSS3</i>                | compound heterozygous c.400A>T (p.LYS134*); c.646C>T (p.Arg216Cys)                                       | N.A /N.A.          | P. (class V)/P. (class V)     | AR | Deafness, autosomal recessive 8 (MIM: 601072)                                                                                                        | No                                             | Inherited in trans                                                         | 27 |
| <i>TMPRSS3</i>                | compound heterozygous c.916G>A p.(Ala306Thr); c.749delT p.(Leu250Argfs*25)                               | rs181949335/ N.A   | P. (class V)/P. (class V)     | AR | Deafness, autosomal recessive 8 (MIM: 601072)                                                                                                        | No                                             | Inherited in trans                                                         | 29 |
| <i>COL4A3</i>                 | heterozygous c.4826G>A, p.(Arg1609Gln)                                                                   | rs1380878336       | L.P. (class IV)               | AD | Alport syndrome, 3 autosomal dominant (MIM: 104200)                                                                                                  | Yes potentially                                | Inherited from father with HL and no sign of                               | 28 |

|                 |                                             |             |              |    |                                                   |     |                         |    |
|-----------------|---------------------------------------------|-------------|--------------|----|---------------------------------------------------|-----|-------------------------|----|
|                 |                                             |             |              |    |                                                   |     | altered kidney function |    |
| <i>MarvelD2</i> | homozygous<br>c.1331+2T>C<br>p.(?)          | rs762352115 | P. (class V) | AR | Deafness, autosomal recessive 49<br>(MIM: 610153) | No  | Inherited in trans      | 31 |
| <i>MYO15A</i>   | homozygous<br>c.6046+1G>A,<br>p.(?)         | rs201978571 | P. (class V) | AR | Deafness, autosomal recessive 3<br>(MIM: 600316)  | No  | Inherited in trans      | 32 |
| <i>NF2</i>      | heterozygous<br>c.1579 G>T,<br>p.(Glu527*)  | rs74315505  | P. (class V) | AD | Neurofibromatose type 2 (MIM:<br>101000)          | Yes | N.A.                    | 62 |
| <i>COCH</i>     | heterozygous<br>c.341T>C ,<br>p.(Leu114Pro) | N.A.        | P. (class V) | AD | Deafness, autosomal dominant 9<br>(MIM: 601369)   | No  | N.A.                    | 63 |
