# Supplementary material for: Benefits of Exome Sequencing in Children with Suspected Isolated Hearing Loss
Source: MDPI journal article supplement (doi:10.3390/genes12081277), 2021-08-20
Supplement: s1 [file s1]

**Table S2. Phenotypes in children:** brief description of auditory phenotypes in our child cohort.

ADHD= attention deficit hyperactivity disorder, ASD= autism spectrum disorder, CP= cleft palate, CT=computed tomography, F= female, IUGR= in utero growth retardation, M=male, M=magnetic resonance imaging, NR= not reported, SN= sensorineural, VSD = ventricular septal defect.

| Patient | Sex | Age at diagnosis | Type  | Laterality | Severity | Progressive | Family history | Consanguinity | Malformations at the time of CT/MRI | Other                                            |
|---------|-----|------------------|-------|------------|----------|-------------|----------------|---------------|-------------------------------------|--------------------------------------------------|
| 1       | F   | Prelingual       | SN    | Bilateral  | Moderate | No          | No             | No            | Yes                                 | No                                               |
| 2       | F   | Congenital       | SN    | Bilateral  | Profound | No          | No             | No            | No                                  | NR                                               |
| 3       | M   | Congenital       | SN    | Bilateral  | Moderate | No          | No             | No            | No                                  | NR                                               |
| 4       | M   | Congenital       | Mixed | Bilateral  | Moderate | No          | No             | No            | Yes                                 | Preauricular pit/cholesteatoma                   |
| 5       | F   | Postlingual      | SN    | Bilateral  | Profound | No          | No             | No            | No                                  | NR                                               |
| 6       | M   | Congenital       | SN    | Bilateral  | Profound | No          | No             | Yes           | Not performed                       | NR                                               |
| 7       | M   | Postlingual      | Mixed | Unilateral | Mild     | No          | No             | No            | Yes                                 | NR                                               |
| 8       | M   | Congenital       | SN    | Bilateral  | Moderate | No          | No             | No            | No                                  | NR                                               |
| 9       | M   | Congenital       | SN    | Bilateral  | Moderate | No          | No             | No            | Not performed                       | Renal cysts/relational issues/ASD -like features |
| 10      | M   | Congenital       | SN    | Bilateral  | Moderate | No          | Yes            | No            | Not performed                       | NR                                               |
| 11      | F   | Congenital       | SN    | Bilateral  | Moderate | No          | No             | No            | Yes                                 | NR                                               |
| 12      | M   | Postlingual      | SN    | Bilateral  | Mild     | No          | No             | No            | No                                  | NR                                               |
| 13      | M   | Postlingual      | SN    | Bilateral  | Moderate | No          | No             | No            | No                                  | NR                                               |
| 14      | F   | Prelingual       | SN    | Bilateral  | Moderate | No          | No             | No            | Not performed                       | NR                                               |
| 15      | M   | Congenital       | SN    | Bilateral  | Moderate | No          | No             | No            | Not performed                       | NR                                               |
| 16      | F   | Postlingual      | SN    | Bilateral  | Moderate | No          | No             | No            | No                                  | NR                                               |
| 17      | F   | Congenital       | SN    | Bilateral  | Moderate | No          | No             | Yes           | No                                  | NR                                               |
| 18      | F   | Congenital       | SN    | Bilateral  | Moderate | Yes         | No             | No            | No                                  | Optic atrophy/IUGR/atrial septal defect          |

|    |   |             |       |            |          |     |     |     |               |                                               |
|----|---|-------------|-------|------------|----------|-----|-----|-----|---------------|-----------------------------------------------|
| 19 | M | Congenital  | SN    | Bilateral  | Moderate | No  | No  | No  | Not performed | Unilateral renal dysplasia                    |
| 20 | M | Congenital  | SN    | Bilateral  | Severe   | No  | No  | No  | Yes           | Keratoderma palmoplantar                      |
| 21 | F | Postlingual | SN    | Bilateral  | Moderate | No  | Yes | No  | Not performed | No                                            |
| 22 | F | Congenital  | SN    | Bilateral  | Moderate | No  | Yes | No  | Not performed | NR                                            |
| 23 | M | Prelingual  | SN    | Bilateral  | Mild     | No  | Yes | No  | Not performed | Excessive timidity/limited interactions       |
| 24 | F | Congenital  | SN    | Bilateral  | Moderate | No  | no  | No  | Not performed | CP /myopia - patella luxation/ arachnodactyly |
| 25 | F | Congenital  | SN    | Bilateral  | Severe   | No  | No  | Yes | No            | NR                                            |
| 26 | M | Congenital  | SN    | Bilateral  | Moderate | No  | Yes | No  | Not performed | NR                                            |
| 27 | F | Congenital  | SN    | Bilateral  | Severe   | Yes | No  | No  | Not performed | NR                                            |
| 28 | M | Postlingual | SN    | Bilateral  | Mild     | No  | Yes | No  | No            | NR                                            |
| 29 | M | Prelingual  | SN    | Bilateral  | Severe   | Yes | Yes | No  | No            | NR                                            |
| 30 | M | Postlingual | SN    | Bilateral  | Moderate | Yes | Yes | No  | Not performed | NR                                            |
| 31 | M | Prelingual  | SN    | Bilateral  | Severe   | No  | No  | No  | Not performed | Cholestasis /ADHD                             |
| 32 | M | Congenital  | SN    | Bilateral  | Profound | No  | Yes | No  | Yes           | Atrial septal defect/ hypothyroidism          |
| 33 | M | Prelingual  | SN    | Bilateral  | Severe   | No  | Yes | No  | No            | NR                                            |
| 34 | M | Congenital  | SN    | Bilateral  | Mild     | No  | Yes | No  | Not performed | NR                                            |
| 35 | M | Prelingual  | SN    | Bilateral  | Moderate | Yes | No  | No  | No            | NR                                            |
| 36 | M | Congenital  | SN    | Unilateral | Profound | No  | No  | No  | No            | NR                                            |
| 37 | F | Prelingual  | Mixed | Bilateral  | Moderate | No  | No  | No  | Yes           | No                                            |
| 38 | F | Congenital  | SN    | Bilateral  | Mild     | No  | Yes | No  | No            | NR                                            |
| 39 | M | Congenital  | Mixed | Bilateral  | Moderate | No  | No  | No  | Yes           | Vertebral malformations                       |
| 40 | F | Postlingual | SN    | Bilateral  | Moderate | No  | Yes | No  | No            | NR                                            |
| 41 | M | Congenital  | SN    | Unilateral | Profound | No  | No  | No  | No            | Heterochromia iridis                          |

|    |   |             |                         |            |          |     |     |    |               |                                                                                                                                                     |
|----|---|-------------|-------------------------|------------|----------|-----|-----|----|---------------|-----------------------------------------------------------------------------------------------------------------------------------------------------|
| 42 | F | Congenital  | SN                      | Bilateral  | Severe   | No  | No  | No | No            | NR                                                                                                                                                  |
| 43 | M | Congenital  | Mixed                   | Bilateral  | Moderate | No  | No  | No | Yes           | NR                                                                                                                                                  |
| 44 | M | Congenital  | SN                      | Bilateral  | Profound | No  | No  | No | Yes           | Vestibular areflexia                                                                                                                                |
| 45 | M | Postlingual | SN                      | Unilateral | Moderate | No  | No  | No | Not performed | Unilateral renal dysplasia                                                                                                                          |
| 46 | M | Postlingual | SN                      | Bilateral  | Severe   | No  | Yes | No | No            | NR                                                                                                                                                  |
| 47 | M | Congenital  | SN                      | Bilateral  | Profound | No  | No  | No | Not performed | Asperger syndrome                                                                                                                                   |
| 48 | F | Postlingual | Mixed                   | Unilateral | Moderate | No  | Yes | No | Yes           | NR                                                                                                                                                  |
| 49 | F | Postlingual | SN                      | Unilateral | Moderate | No  | No  | No | No            | NR                                                                                                                                                  |
| 50 | M | Postlingual | SN                      | Bilateral  | Moderate | Yes | Yes | No | Yes           | NR                                                                                                                                                  |
| 51 | F | Congenital  | SN Auditory neuropathy  | Bilateral  | Moderate | No  | No  | No | No            | NR                                                                                                                                                  |
| 52 | M | Congenital  | SN                      | Bilateral  | Moderate | No  | no  | No | No            | NR                                                                                                                                                  |
| 53 | M | Congenital  | SN                      | Bilateral  | Mild     | No  | Yes | No | Yes           | Dysplasic helix /VSD and atrial septal defect - micropenis / hypospadias/ right testicular hypoplasia /left kidney duplication/ teeth malposition   |
| 54 | F | Prelingual  | SN                      | Bilateral  | Severe   | No  | No  | No | Not performed | Walking delay                                                                                                                                       |
| 55 | M | Prelingual  | SN                      | Bilateral  | Moderate | No  | No  | No | No            | IUGR /global developmental delay                                                                                                                    |
| 56 | M | Congenital  | SN (right) mixed (left) | Bilateral  | Moderate | No  | No  | No | Not performed | Global developmental delay-/VSD/inguinal hernia /CP /facial asymmetry/ bilateral atresia of the auditory canals/ lop ears/ right auricular appendix |

|    |   |            |                  |            |          |    |     |     |               |                                                                                                                                                                                                   |
|----|---|------------|------------------|------------|----------|----|-----|-----|---------------|---------------------------------------------------------------------------------------------------------------------------------------------------------------------------------------------------|
| 57 | F | Congenital | Transmissio<br>n | Unilateral | Mild     | No | No  | No  | Yes           | Overgrowth/motor<br>developmental<br>delay/hypotonia /global<br>hyperlaxity/macrocephal<br>y/ downslanting<br>palpebral fissures/<br>strabism / dysplasic<br>ears/bifid uvula / VSD<br>/flat feet |
| 58 | F | Prelingual | Transmissio<br>n | Bilateral  | Moderate | No | Yes | Yes | Yes           | Narrow external<br>auditory canal/ CP /right<br>ear cholesteatoma                                                                                                                                 |
| 59 | F | Congenital | SN               | Bilateral  | Moderate | No | No  | No  | No            | Speech delay                                                                                                                                                                                      |
| 60 | F | Congenital | SN               | Unilateral | Severe   | No | Yes | No  | No            | No                                                                                                                                                                                                |
| 61 | F | Congenital | SN               | Bilateral  | Moderate | No | Yes | No  | Not performed | No                                                                                                                                                                                                |
