# Supplementary material for: Benefits of Exome Sequencing in Children with Suspected Isolated Hearing Loss
Source: MDPI journal article supplement (doi:10.3390/genes12081277), 2021-08-20
Supplement: s1 [file s1]

**Table S5.** Summary of molecular results classified as VUS (children and adults). Rs number are provided when available. MIM= *Mendelian Inheritance in Man*, rs= Reference SNP

| Patient   | Variant of unknown significance                                                                                                                                           | Phenotype (Phenotype MIM number)                                                                                                                                                                                                                                                                       | Heritance status                                            |
|-----------|---------------------------------------------------------------------------------------------------------------------------------------------------------------------------|--------------------------------------------------------------------------------------------------------------------------------------------------------------------------------------------------------------------------------------------------------------------------------------------------------|-------------------------------------------------------------|
| <b>1</b>  | compound heterozygous c.5000G>A, p.(Arg1667His), rs146555195; c.4550A>G, p.(Asp1517Gly) in <i>COL11A2</i>                                                                 | Deafness, autosomal recessive 53 (MIM: 609706)                                                                                                                                                                                                                                                         | Inherited in trans                                          |
| <b>33</b> | compound heterozygous c.641G>A, p.(Arg214His), rs200324356; c.643T>G, p.(Trp215Gly), rs761347854 in <i>TBC1D24</i>                                                        | Deafness, autosomal recessive 86 (MIM: 614617)                                                                                                                                                                                                                                                         | Inherited in trans - affected brother carries both variants |
| <b>42</b> | heterozygous c.6841G>A, p.(Val228Ile) in <i>CDH23</i>                                                                                                                     | Deafness, autosomal recessive (MIM 601386)/ (Pituitary adenoma 5, multiple types) (MIM 617540)/ Autosomal dominant Usher syndrome 1D (MIM 601067), Autosomal recessive, Digenic recessive Usher syndrome Type 1D/F (601067)                                                                            | Parents unavailable                                         |
| <b>46</b> | heterozygous c.4885delA, p.S1629fs & c.964T>A, p.Ser322Thr in <i>PCDH15</i> ; (cis) c.13133C>T, p.Pro437Leu & c.6800C>T, p.Pro2267 Leu, rs397518027 in <i>USH2A</i> (cis) | <i>PCDH15</i> : Deafness, autosomal recessive 23, autosomal recessive Usher syndrome 1D/F digenic (MIM 601607), Autosomal recessive, Digenic recessive/Usher syndrome 1F (MIM 602083)<br><i>USH2A</i> : Autosomal recessive Usher syndrome, type 2A (MIM 276901), Retinitis pigmentosa 38 (MIM 613809) | All variants inherited from mother without HL               |
| <b>51</b> | heterozygous c.852_854delTATinsATG, p.(Phe284_Met285delinsLeuTrp) in <i>OSBPL2</i>                                                                                        | Deafness, autosomal dominant (MIM: 616340)                                                                                                                                                                                                                                                             | Inherited from mother without HL                            |
| <b>64</b> | heterozygous c.418C>G, p.(Leu140Val) in <i>TBC1D24</i>                                                                                                                    | Deafness, autosomal dominant 65 (MIM: 616044)                                                                                                                                                                                                                                                          | Parents unavailable                                         |
